# Supplementary material for: Role of the Tau N-terminal region in microtubule stabilization revealed by new endogenous truncated forms
Source: PubMed Central journal article supplement (PMC4431475; doi:10.1038/srep09659), 2015-05-14

**Title:**

Role of the Tau N-terminal region in microtubule stabilization revealed by new endogenous truncated forms

**Authors:** Maxime Derisbourg<sup>1,2,3</sup>, Coline Leghay<sup>1,2,3</sup>, Giovanni Chiappetta<sup>4</sup>, Francisco-Jose Fernandez-Gomez<sup>1,2</sup>, Cyril Laurent<sup>1,2</sup>, Dominique Demeyer<sup>1,2,3</sup>, Sébastien Carrier,<sup>1,2,3</sup> Valérie Buée-Scherrer<sup>1,2,3</sup>, David Blum<sup>1,2,3</sup>, Joëlle Vinh<sup>4</sup>, Nicolas Sergeant<sup>1,2,3</sup>, Yann Verdier<sup>4</sup>, Luc Buée<sup>1,2,3</sup>, Malika Hamdane\*<sup>1,2,3</sup>.

**Figure S1:** Representative WB of human frontal cortex from patients displaying Braak 0 (BO) and Braak VI (BVI) neuropathology after immunoprecipitation of Tau proteins with the Tau-5 antibody. Unb: unbound, Tau5-IP: eluted proteins, Beads: non eluted proteins. The gels have been run under the same experimental conditions. Cropped blots are displayed; Full-length blots are presented in these supplementary data (as Fig. S12)

**Figure S2: Validation of co-IP conditions.** A: Sequence coverage of the Hsc70 protein (P11142) co-purified with the Tau protein. B: MS/MS spectra of a unique peptide of the Hsc70 protein.

**Figure S3:** MS/MS spectra of: A. the N-terminally labeled peptide M(thio-propionyl)EDHAGTYGLGD; B: the QARMVSK(thio-propionyl)SK peptide.

**Figure S4: Differences in  $\alpha$ -tubulin acetylation are not related to differences in HDAC6 expression or activity.** A: Nuclear and cytoplasmic fractions of N15-115 cells expressing FL-Tau, Met11-Tau and Gln124-Tau were analyzed by WB to investigate the level of HDAC6. The gels have been run under the same experimental conditions. Cropped blots are displayed; Full-length blots are presented in these supplementary data (as Fig. S13). B: Quantification of the HDAC6/actin ratio in the cytoplasmic fraction. C: Measurements of HDAC6 activity on cytoplasmic extracts. Tubacin was used as a positive control of HDAC6 inhibition. Error bars indicate SEM.  $N \geq 3$  independent experiments \*\*:  $P \leq 0.01$ . Differences between mean values were determined using One-way ANOVA followed by Fisher's LSD post hoc test.

**Figure S5: Effect of FL-Tau, Met11-Tau and Gln124-Tau fragments on neuritic like extension induced by cytochalasin B .** A: Confocal imaging of N15-115 cells overexpressing Tau (green) and treated with cytochalasin B for 1 hour. Neuritic extension can be observed following tubulin labeling (red). Scale bar: 50  $\mu$ M. B: Quantification of cells expressing Tau species which display neurites extension after cyto treatment. NT: non treated; cyto: Cytochalasin B

**Figure S6: Expression pattern of Val229-Tau and Gly261-Tau fragments and effect on neuritic like extension and microtubular distribution, compared to FL-Tau, Met11-Tau and Gln124-Tau fragments.** A: Schematic representation of 1N4R FL-Tau isoform, which includes exons 2 and 10, and the Met11-Tau, Gln124-Tau, Val229-Tau and Gly261-Tau fragments. PR: proline rich domain; Representative WB analysis using the Tau-Cter antibody of protein extracts from N1E-115 cells transfected with control vector (mock), FL-Tau and the fragments Met11-Tau, Gln124-Tau, Val229-Tau and Gly261-Tau. GAPDH was used as a loading control. Cropped blot is displayed. B: Effect of Val229-Tau and Gly261-Tau fragments, compared to FL-Tau, Met11-Tau and Gln124-Tau

fragments on neuritic like extension induced by cytochalasin B; Confocal imaging of N15-115 cells overexpressing Tau (green) and treated with cytochalasin B for 1 hour. Neuritic extension can be observed following tubulin labeling (red). Scale bar: 50  $\mu$ M; Histograms represent quantification of cells expressing Tau species, which display neuritis extension after cyto treatment. NT: non treated; cyto: Cytochalasin B. C: Representative WB analysis of microtubule fractions from N1E-115 cell extracts transiently transfected with FL-Tau and Tau fragments: Met11-Tau, Gln124-Tau, Val229-Tau and Gly261-Tau. The purity of the fractions was evaluated using an antibody to acetylated  $\alpha$ -tubulin. Cropped blot is displayed; Quantification was performed by calculating the ratio of microtubule-associated Tau to total Tau. Error bars indicate SEM.  $N \geq 3$  independent experiments. \*:  $P \leq 0.05$ , \*\*:  $P \leq 0.01$ . Differences between mean values were determined using One-way ANOVA followed by Fisher's LSD post hoc test.

**Figure S7: Full-length blots of cropped blots presented in Fig. 1 of the main paper.** A: related to Fig.1A of the main paper. B: related to Fig.1B of the main paper.

**Figure S8: Full-length blots of cropped blots presented in Fig. 2 of the main paper.** A: related to Fig.2B of the main paper. B: related to Fig.2C of the main paper.

**Figure S9: Full-length blots of cropped blot presented in Fig. 3A of the main paper.**

**Figure S10: Full-length blots of cropped blot presented in Fig. 4A of the main paper.**

**Figure S11: Full-length blots of cropped blot presented in Fig. 5A of the main paper.**

**Figure S12: Full-length blots of cropped blot presented in Fig. S1 of these supplementary informations.**

**Figure S13: Full-length blots of cropped blot presented in Fig. S4 of these supplementary informations.**

Table. S1A

## Full list of semi-tryptic and semi-Asp-N peptides

| Residue position | N-ter cleavage    | Detected peptide        | Modification (s)                            | MH+ Da     |
|------------------|-------------------|-------------------------|---------------------------------------------|------------|
| 2                | unspecific        | AEPRQEFVME              | N-Term(Acetyl)                              | 1406,62499 |
| 2                | unspecific        | AEPRQEFVME              | N-Term(Acetyl); M10(Oxidation)              | 1422,62026 |
| 11               | unspecific        | MEDHAGTYGLGDR           | N-Term(Thio-)                               | 1509,60953 |
| 11               | unspecific        | MEDHAGTYGLGDR           | N-Term(Thio-); M1(Oxidation)                | 1525,60238 |
| 12               | unspecific        | EDHAGTYGLGDR            | N-Term(Thio-)                               | 1378,56938 |
| 103              | unspecific        | AEEAGIGDTPSLEDAAGHVTQAR |                                             | 2424,12487 |
| 124              | unspecific        | QARMVSKSK               | K7(Thio-); K9(Thio-)                        | 1210,57489 |
| 124              | unspecific        | QARMVSKSK               | K7(Thio-)                                   | 1122,57336 |
| 124              | unspecific        | QARMVSKSK               | N-Term(Gln->pyro-Glu); K7(Thio-)            | 1105,54891 |
| 124              | unspecific        | QARMVSKSK               | N-Term(Gln->pyro-Glu); K7(Thio-); K9(Thio-) | 1193,54651 |
| 124              | unspecific        | QARMVSKSK               | M4(Oxidation); K7(Thio-); K9(Thio-)         | 1226,56879 |
| 124              | unspecific        | QARMVSKSKDGTGS          | K7(Thio-); K9(Thio-)                        | 1627,72435 |
| 127              | unspecific        | MVSKSKDGTGS             | K4(Thio-); K6(Thio-)                        | 1272,52648 |
| 147              | unspecific        | GKTKIATPR               | K2(Thio-); K4(Thio-)                        | 1147,59564 |
| 157              | unspecific        | AAPPQKQGQANATR          | K7(Thio-)                                   | 1454,71737 |
| 159              | unspecific        | PPGQKQGQANATR           | K5(Thio-)                                   | 1312,64092 |
| 172              | unspecific        | PAKTPAPK                | K3(Thio-)                                   | 994,538865 |
| 174              | unspecific        | KTPAPKTPSSGEPPK         | N-Term(Thio-); K7(Thio-)                    | 1891,92823 |
| 174              | unspecific        | KTPAPKTPSSGEPPKSG       | K1(Thio-)                                   | 1947,98626 |
| 224              | unspecific        | KKVAVVR                 | N-Term(Thio-); K2(Thio-)                    | 975,547708 |
| 229              | unspecific        | VRTPPKSPSSAKSRLQTAPVPMP | K6(Thio-); K12(Thio-); M22(Oxidation)       | 2624,33967 |
| 232              | unspecific        | PPKSPSSAKSR             | K3(Thio-); K9(Thio-)                        | 1317,62703 |
| 238              | unspecific        | SAKSRLQTAPVPMP          | N-Term(Thio-)                               | 1570,80723 |
| 238              | unspecific        | SAKSRLQTAPVPMP          | K3(Thio-); M13(Oxidation)                   | 1586,80062 |
| 240              | unspecific        | KSRLQTAPVPMP            | N-Term(Thio-)                               | 1412,73739 |
| 240              | unspecific        | KSRLQTAPVPMP            | N-Term(Thio-); M11(Oxidation)               | 1428,73623 |
| 253              | unspecific        | PKKVAVVR                | K2(Thio-); K3(Thio-)                        | 1072,60014 |
| 259              | unspecific        | KIGSTENLK               | K1(Thio-)                                   | 1077,55992 |
| 261              | unspecific        | GSTENLKHQPGGGK          | K7(Thio-)                                   | 1497,71243 |
| 280              | unspecific        | KKLDLSNVQSK             | N-Term(Thio-); K2(Thio-)                    | 1435,72837 |
| 306              | unspecific        | VQIVYKPVLDLSK           | K6(Thio-)                                   | 1476,81205 |
| 306              | unspecific        | VQIVYKPV                |                                             | 945,577304 |
| 308              | unspecific        | IVYKPVLDLSK             | N-Term(Thio-); K4(Thio-)                    | 1337,69232 |
| 308              | unspecific        | IVYKPVLDLSK             | K4(Thio-)                                   | 1249,68727 |
| 309              | unspecific        | VYKPVLDLSK              | K3(Thio-)                                   | 1136,60348 |
| 311              | unspecific        | KPVLDLSK                | N-Term(Thio-); K7(Thio-)                    | 962,469585 |
| 311              | unspecific        | KPVLDLSKVTSK            | K1(Thio-); K7(Thio-)                        | 1377,71123 |
| 311              | unspecific        | KPVLDLSKVTSK            | K7(Thio-)                                   | 1289,7134  |
| 314              | AspN + unspecific | DLSKVTSK                | K4(Thio-)                                   | 965,497619 |
| 331              | unspecific        | KPGGGQVEVK              | N-Term(Thio-)                               | 1086,56173 |
| 369              | unspecific        | KKIETHK                 | K1(Thio-); K2(Thio-)                        | 1059,53111 |
| 391              | unspecific        | EIVYKSPVVSG             | K5(Thio-)                                   | 1265,64539 |
| 391              | unspecific        | EIVYKSPVVSG             |                                             | 1177,6435  |
| 395              | unspecific        | KSPVVSGDTSR             | N-Term(Thio-)                               | 1317,64553 |

Unspecific peptides detected at least in one sample are shown, with the corresponding first amino acid residue and N-terminal modifications (numbering of N-terminal residues correspond to the N-terminal cleavage site identified).

Table. S1B

| Residue position | N-ter cleavage | Detected peptide       | Modification (s)                          | MH+ Da     |
|------------------|----------------|------------------------|-------------------------------------------|------------|
| 13               | AspN           | DHAGTYGLGDR            | N-Term(Thio-)                             | 1249,52514 |
| 13               | AspN           | DHAGTYGLGDRK           | K12(Thio-)                                | 1377,61942 |
| 22               | AspN           | DRKDQGGYTMHQ           | N-Term(Thio-)                             | 1523,6374  |
| 25               | AspN           | DQGGYTMHQDQEGDTDAGLK   |                                           | 2165,90082 |
| 34               | AspN           | DQEGDTDAGLKESPLQTPTE   | K11(Thio-)                                | 2218,96318 |
| 38               | AspN           | DTDAGLKESPLQTPTE       | K7(Thio-)                                 | 1789,81828 |
| 139              | AspN           | DKKAKGA                | K2(Thio-); K3(Thio-); K5(Thio-)           | 981,420266 |
| 193              | AspN           | DRSGYSSPGSPGTPGSR      |                                           | 1664,76377 |
| 252              | AspN           | DLKNVKS                | K6(Thio-); K8(Thio-)                      | 1107,55387 |
| 252              | AspN           | DLKNVKS                | K6(Thio-)                                 | 1132,63972 |
| 252              | AspN           | DLKNVKS                | N-Term(Thio-); K6(Thio-); K8(Thio-)       | 1682,77876 |
| 252              | AspN           | DLKNVKS                | K3(Thio-); K8(Thio-)                      | 1594,77824 |
| 252              | AspN           | DLKNVKS                | K6(Thio-)                                 | 1506,7844  |
| 283              | AspN           | DLSNVQSK               | K8(Thio-)                                 | 978,456404 |
| 283              | AspN           | DLSNVQSKC              | K8(Thio-); C9(Carbamidomethyl)            | 1138,48566 |
| 283              | AspN           | DLSNVQSKC              |                                           | 993,465083 |
| 283              | AspN           | DLSNVQSKCG             | K8(Thio-)                                 | 1138,48566 |
| 283              | AspN           | DLSNVQSKCGSK           | K12(Thio-)                                | 1353,61378 |
| 283              | AspN           | DLSNVQSKCGSK           | K8(Thio-); K12(Thio-)                     | 1441,61087 |
| 283              | AspN           | DLSNVQSKCGSK           |                                           | 1265,61538 |
| 295              | AspN           | DNIKHVPGGGSV           | N-Term(Thio-)                             | 1267,61057 |
| 295              | AspN           | DNIKHVPGGGSVQ          | K4(Thio-)                                 | 1395,66632 |
| 295              | AspN           | DNIKHVPGGGSVQI         | K4(Thio-)                                 | 1508,75308 |
| 295              | AspN           | DNIKHVPGGGSVQIV        | K4(Thio-)                                 | 1607,8191  |
| 295              | AspN           | DNIKHVPGGGSVQIVYKPV    | N-Term(Thio-); K17(Thio-)                 | 2183,09418 |
| 295              | AspN           | DNITHVPGGGNK           | K12(Thio-)                                | 1296,6025  |
| 295              | AspN           | DNITHVPGGGNKK          | K12(Thio-); K13(Thio-)                    | 1512,69222 |
| 295              | AspN           | DNITHVPGGGNKK          | K12(Thio-)                                | 1424,69464 |
| 295              | AspN           | DNITHVPGGGNKKI         | K12(Thio-); K13(Thio-)                    | 1625,77583 |
| 295              | AspN           | DNITHVPGGGNKKIE        | K12(Thio-)                                | 1666,81992 |
| 295              | AspN           | DNITHVPGGGNKKIET       | K12(Thio-); K13(Thio-)                    | 1855,86555 |
| 295              | AspN           | DNITHVPGGGNKKIETH      | K12(Thio-); K13(Thio-)                    | 1992,92367 |
| 295              | AspN           | DNITHVPGGGNKKIETH      | K12(Thio-)                                | 1904,92351 |
| 295              | AspN           | DNITHVPGGGNKKIETHK     | K12(Thio-); K13(Thio-); K18(Thio-)        | 2209,0186  |
| 295              | AspN           | DNITHVPGGGNKKIETHK     | K12(Thio-); K13(Thio-)                    | 2121,02158 |
| 295              | AspN           | DNITHVPGGGNKKIETHKL    | K12(Thio-); K13(Thio-); K18(Thio-)        | 2322,09952 |
| 295              | AspN           | DNITHVPGGGNKKIETHKLTFR | K12(Thio-); K13(Thio-); K18(Thio-)        | 2726,31926 |
| 314              | AspN           | DLSKVTSK               | K4(Thio-); K8(Thio-)                      | 1053,49435 |
| 314              | AspN           | DLSKVTSKC              | N-Term(Thio-); K8(Thio-)                  | 1156,50549 |
| 314              | AspN           | DLSKVTSK               | K4(Thio-); K8(Thio-); C9(Carbamidomethyl) | 1213,52594 |
| 314              | AspN           | DLSKVTSK               | K8(Thio-); C9(Carbamidomethyl)            | 1125,52773 |
| 314              | AspN           | DLSKVTSKCG             | K4(Thio-); K8(Thio-)                      | 1213,52651 |
| 314              | AspN           | DLSKVTSKCG             | K4(Thio-)                                 | 1125,5277  |
| 314              | AspN           | DLSKVTSKCGSL           | K4(Thio-); K8(Thio-); C9(Carbamidomethyl) | 1470,66377 |
| 314              | AspN           | DLSKVTSKCGSL           | C9(Carbamidomethyl)                       | 1294,66724 |
| 314              | AspN           | DLSKVTSKCGSL           |                                           | 1237,64536 |
| 314              | AspN           | DLSKVTSKCGSLG          | N-Term(Thio-); K8(Thio-)                  | 1470,66269 |
| 314              | AspN           | DLSKVTSKCGSLG          | K8(Thio-)                                 | 1382,66476 |
| 314              | AspN           | DLSKVTSKCGSLG          |                                           | 1294,66741 |
| 348              | AspN           | DRVQSKIG               | K6(Thio-)                                 | 990,503636 |
| 348              | AspN           | DRVQSKIGS              | K6(Thio-)                                 | 1077,53519 |
| 348              | AspN           | DRVQSKIGSL             | K6(Thio-)                                 | 1190,61933 |
| 348              | AspN           | DRVQSKIGSL             |                                           | 1102,62239 |
| 348              | AspN           | DRVQSKIGSLD            | K6(Thio-)                                 | 1305,6461  |
| 387              | AspN           | DHGAEIVYKSPVVSG        | K9(Thio-)                                 | 1645,78744 |
| 387              | AspN           | DHGAEIVYKSPVVSG        |                                           | 1557,78865 |
| 402              | AspN           | DTSRHLNSVSSTGSI        | N-Term(Thio-)                             | 1745,81177 |
| 402              | AspN           | DTSRHLNSVSSTGSI        |                                           | 1657,81427 |
| 402              | AspN           | DTSRHLNSVSSTGSI        |                                           | 2002,94662 |

Asp-N peptides detected in at least one sample are shown, with the corresponding first amino acid residue and N-terminal modifications (numbering of N-terminal residues correspond to the N-terminal cleavage site identified).

Table. S1C

| Residue position | N-ter cleavage | Detected peptide      | Modification (s)                              | MH+ Da     |
|------------------|----------------|-----------------------|-----------------------------------------------|------------|
| 6                | trypsin        | QEFVEMEDHAGTYGLGDR    | N-Term(Gln->pyro-Glu); M6(Oxidation)          | 2052,85937 |
| 6                | trypsin        | QEFVEMEDHAGTYGLGDR    |                                               | 2053,89274 |
| 6                | trypsin        | QEFVEMEDHAGTYGLGDR    | M6(Oxidation)                                 | 2069,88523 |
| 24               | trypsin        | KDQGGYTMH             | K1(Thio-)                                     | 1124,44931 |
| 24               | trypsin        | KDQGGYTMHQDEGDTDAGLK  | K1(Thio-)                                     | 2381,99814 |
| 24               | trypsin        | KDQGGYTMHQDEGDTDAGLK  | K1(Thio-); M8(Oxidation)                      | 2397,99096 |
| 68               | trypsin        | STPTAEDVTAPLVDEGAPGK  |                                               | 1954,96381 |
| 127              | trypsin        | MVSKSKDGTGSDDK        | K4(Thio-); K6(Thio-)                          | 1630,67175 |
| 127              | trypsin        | MVSKSKDGTGSDDK        | M1(Oxidation); K4(Thio-); K6(Thio-)           | 1646,66567 |
| 131              | trypsin        | SKDGTGSDDK            | N-Term(Thio-); K11(Thio-)                     | 1313,53457 |
| 142              | trypsin        | AKGADGKTK             | N-Term(Thio-); K7(Thio-)                      | 1051,49166 |
| 144              | trypsin        | GADGKTKIATPR          | K5(Thio-); K7(Thio-)                          | 1390,67739 |
| 144              | trypsin        | GADGKTKIATPR          | N-Term(Thio-); K5(Thio-); K7(Thio-)           | 1478,6793  |
| 156              | trypsin        | GAAPPGQKQG            | K8(Thio-)                                     | 998,472517 |
| 156              | trypsin        | GAAPPGQKQGAN          | K8(Thio-)                                     | 1183,55277 |
| 156              | trypsin        | GAAPPGQKQGANATR       | K8(Thio-)                                     | 1511,73566 |
| 171              | trypsin        | IPAKTPPAPK            | K4(Thio-)                                     | 1107,62297 |
| 171              | trypsin        | IPAKTPPAPKTPSSSGEPPK  | K4(Thio-); K10(Thio-)                         | 2173,10375 |
| 175              | trypsin        | TPPAPKTPSSSGEPPK      | K6(Thio-)                                     | 1675,83398 |
| 175              | trypsin        | TPPAPKTPSSSGEPPKSGDR  | K6(Thio-); K16(Thio-)                         | 2179,01493 |
| 175              | trypsin        | TPPKSPSSAK            | K4(Thio-)                                     | 1087,54494 |
| 175              | trypsin        | TPPKSPSSAK            | N-Term(Thio-); K10(Thio-)                     | 1175,54235 |
| 175              | trypsin        | TPPKSPSSAKSR          | K4(Thio-); K10(Thio-)                         | 1418,6765  |
| 175              | trypsin        | TPSSSGEPPKSGDR        | K10(Thio-)                                    | 1499,67886 |
| 195              | trypsin        | SGYSSPGSPGTPGSR       |                                               | 1393,63351 |
| 195              | trypsin        | SGYSSPGSPGTPGSR       | N-Term(Thio-)                                 | 1481,63153 |
| 212              | trypsin        | TPSLPTPTPR            |                                               | 1066,58939 |
| 212              | trypsin        | TPSLPTPTPREPK         |                                               | 1420,77922 |
| 222              | trypsin        | EPKKVAVVR             | N-Term(Glu->pyro-Glu); K4(Thio-)              | 1095,63297 |
| 222              | trypsin        | EPKKVAVVR             | N-Term(Thio-); K4(Thio-)                      | 1201,64156 |
| 222              | trypsin        | EPKKVAVVR             | N-Term(Glu->pyro-Glu); K3(Thio-); K4(Thio-)   | 1183,63204 |
| 241              | trypsin        | SRLQTAPVPMP           |                                               | 1196,64678 |
| 243              | trypsin        | LQTAPVPMP             |                                               | 953,511077 |
| 243              | trypsin        | LQTAPVPMPDLK          |                                               | 1309,71765 |
| 243              | trypsin        | LQTAPVPMPDLK          | M8(Oxidation)                                 | 1325,71345 |
| 243              | trypsin        | LQTAPVPMPDLK          | K12(Thio-)                                    | 1397,71714 |
| 243              | trypsin        | LQTAPVPMPDLKN         | K12(Thio-)                                    | 1511,75992 |
| 243              | trypsin        | LQTAPVPMPDLKN         | M8(Oxidation); K12(Thio-)                     | 1527,75656 |
| 243              | trypsin        | LQTAPVPMPDLKNVK       | K15(Thio-)                                    | 1738,92395 |
| 243              | trypsin        | LQTAPVPMPDLKNVK       | M8(Oxidation); K12(Thio-)                     | 1754,91702 |
| 243              | trypsin        | LQTAPVPMPDLKNVKS      | M8(Oxidation); K12(Thio-); K15(Thio-)         | 1929,94724 |
| 243              | trypsin        | LQTAPVPMPDLKNVKS      | M8(Oxidation); K12(Thio-); K17(Thio-)         | 2058,0458  |
| 255              | trypsin        | NVSKIGSTENLK          | K3(Thio-); K5(Thio-)                          | 1593,79727 |
| 258              | trypsin        | SKIGSTENLK            | K2(Thio-)                                     | 1164,59137 |
| 258              | trypsin        | SKIGSTENLK            | N-Term(Acetyl); K2(Thio-)                     | 1206,61486 |
| 258              | trypsin        | SKIGSTENLKHQPGGGK     | N-Term(Thio-); K10(Thio-)                     | 1913,9199  |
| 260              | trypsin        | IGSTENLKH             | K8(Thio-)                                     | 1086,52457 |
| 260              | trypsin        | IGSTENLKHQPGGGK       | K8(Thio-)                                     | 1610,79249 |
| 268              | trypsin        | HQPGGGKVQI            | K7(Thio-)                                     | 1108,5573  |
| 268              | trypsin        | HQPGGGKVQII           | K7(Thio-)                                     | 1221,6413  |
| 268              | trypsin        | HQPGGGKVQIIN          | N-Term(Thio-)                                 | 1335,68333 |
| 268              | trypsin        | HQPGGGKVQIINK         | K7(Thio-)                                     | 1463,77678 |
| 281              | trypsin        | KLDLSNVQSK            | N-Term(Thio-)                                 | 1219,63406 |
| 282              | trypsin        | LDLSNVQSK             |                                               | 1003,54199 |
| 282              | trypsin        | LDLSNVQSKCGSK         | K9(Thio-)                                     | 1466,6971  |
| 299              | trypsin        | HVPGGGSVQIV           |                                               | 1049,57411 |
| 299              | trypsin        | HVPGGGSVQIVY          |                                               | 1212,6364  |
| 299              | trypsin        | HVPGGGSVQIVYKPV       |                                               | 1536,8522  |
| 299              | trypsin        | HVPGGGSVQIVYKPVDSLK   |                                               | 1980,08947 |
| 312              | trypsin        | PVDLSKVTSK            | K6(Thio-)                                     | 1161,61832 |
| 318              | trypsin        | VTSKCGSL              | N-Term(Thio-); K4(Thio-); C5(Carbamidomethyl) | 1027,43011 |
| 318              | trypsin        | VTSKCGSLGN            | K4(Thio-)                                     | 1053,47119 |
| 322              | trypsin        | CGSLGNIHHKPGGGQVEVK   |                                               | 1916,97431 |
| 322              | trypsin        | CGSLGNIHHKPGGGQVEVK   | K10(Thio-)                                    | 2004,97098 |
| 328              | trypsin        | IHHKPGGGQVEVK         | K4(Thio-)                                     | 1473,76243 |
| 332              | trypsin        | PGGGQVEVKSEK          | K9(Thio-)                                     | 1302,6343  |
| 341              | trypsin        | SEKLDLFK              | K3(Thio-)                                     | 954,460063 |
| 341              | trypsin        | SEKLDLFKDR            | K3(Thio-); K7(Thio-)                          | 1313,58737 |
| 350              | trypsin        | VQSKIGSLDN            | K4(Thio-)                                     | 1148,56166 |
| 350              | trypsin        | VQSKIGSLDNIT          | K4(Thio-)                                     | 1362,69425 |
| 350              | trypsin        | VQSKIGSLDNITH         | K4(Thio-)                                     | 1499,75082 |
| 350              | trypsin        | VQSKIGSLDNITHVPGGGN   | N-Term(Thio-)                                 | 1980,98008 |
| 350              | trypsin        | VQSKIGSLDNITHVPGGGNK  | K4(Thio-)                                     | 2109,07556 |
| 350              | trypsin        | VQSKIGSLDNITHVPGGGNKK | K4(Thio-); K20(Thio-)                         | 2325,16676 |
| 354              | trypsin        | IGSLDNITHVPGGGNK      |                                               | 1578,82346 |
| 354              | trypsin        | IGSLDNITHVPGGGNKK     | K17(Thio-)                                    | 1794,91563 |
| 371              | trypsin        | IETHKLTFR             | K5(Thio-)                                     | 1232,6452  |
| 380              | trypsin        | ENAKAKTDHGAEIVY       | N-Term(Thio-); K4(Thio-)                      | 1821,81108 |
| 380              | trypsin        | ENAKAKTDHGAEIVYK      | K4(Thio-); K6(Thio-)                          | 1949,90891 |
| 384              | trypsin        | AKTDHGAEI             | K2(Thio-)                                     | 1029,46803 |
| 384              | trypsin        | AKTDHGAEIV            | K2(Thio-)                                     | 1128,53499 |
| 384              | trypsin        | AKTDHGAEIVY           | N-Term(Thio-)                                 | 1291,59716 |
| 384              | trypsin        | AKTDHGAEIVYK          | N-Term(Thio-)                                 | 1419,69386 |
| 386              | trypsin        | TDHGAEIVYK            | N-Term(Thio-)                                 | 1220,56102 |
| 386              | trypsin        | TDHGAEIVYKSPVSGDTSR   | K10(Thio-)                                    | 2303,09623 |
| 407              | trypsin        | HLSNVSTGSDIMVDSPLA    |                                               | 2057,98125 |

Tryptic peptides detected in at least one sample are shown, with the corresponding first amino acid residue and N-terminal modifications (numbering of N-terminal residues correspond to the N-terminal cleavage site identified).

Table. S2

**Summary of antibodies used**

| <b>Antibody</b>                   | <b>Species</b> | <b>Dilution</b>   | <b>Application(s)</b> | <b>Supplier</b> |
|-----------------------------------|----------------|-------------------|-----------------------|-----------------|
| Tau-Nter (total Tau, 1-19)        | Rabbit         | 1/10 000          | WB                    | Homemade        |
| Tau-Cter (total Tau, 426-441)     | Rabbit         | 1/10 000 – 1/1000 | WB - ICC              | Homemade        |
| Tau-5                             | Mouse          | 1/1000 - 1/100    | WB - IP               | Invitrogen      |
| PSer396                           | Rabbit         | 1/10 000          | WB                    | Invitrogen      |
| AT180                             | Mouse          | 1/500             | WB                    | Pierce          |
| 12E8                              | Rabbit         | 1/1000            | WB                    | Homemade        |
| $\alpha$ -tubulin (Total-tubulin) | Mouse          | 1/1000 - 1/200    | WB - ICC              | Sigma           |
| Acetyl- $\alpha$ -tubulin         | Mouse          | 1/2000 - 1/200    | WB - ICC              | Sigma           |
| Tyrosinated- $\alpha$ -tubulin    | Mouse          | 1/1000            | WB                    | Sigma           |
| Detyrosinated - $\alpha$ -tubulin | Mouse          | 1/2000            | WB                    | Abcam           |
| $\beta$ -actin                    | Mouse          | 1/10 000          | WB                    | Sigma           |
| GAPDH                             | Rabbit         | 1/10 000          | WB                    | Santa Cruz      |
| Lamin-B                           | Goat           | 1/1000            | WB                    | Santa Cruz      |
| HDAC6                             | Rabbit         | 1/1000            | WB                    | Cell signaling  |

Fig. S1

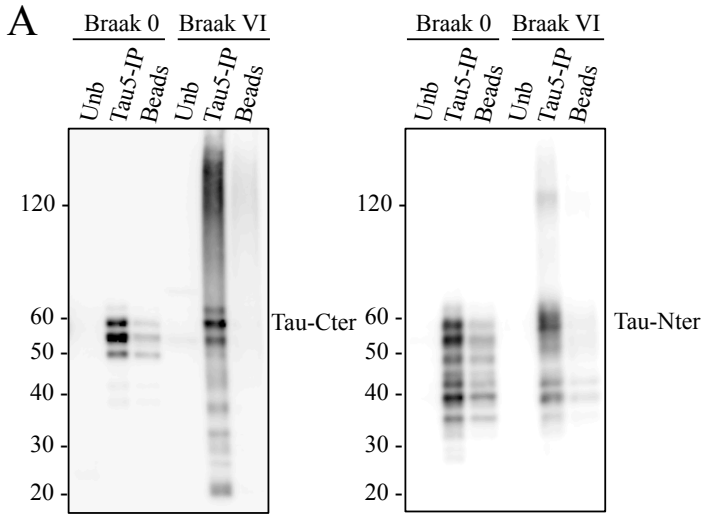



Fig. S2

A

|     | 1          | 11         | 21         | 31         | 41         | 51         | 61         | 71           | 81         | 91         | 101        |            |            |
|-----|------------|------------|------------|------------|------------|------------|------------|--------------|------------|------------|------------|------------|------------|
| 1   | MSKGP      | AVGID      | LGTTYSCVGV | TT         | FQHGKVEIIA | NDQGNRTTPS | YVAFTDTERL | IGDAAKNQVA   | MNPTNTVFDA | KRLIGRRFDD | AVVQSDMKHW | PFMVVNDAGR | PKVQVEYKGE |
| 111 | TKSFYP     | EEVVS      | SMVLTKMKEI | AEAYLGKTVI | NAVVIVPAYF | NDSQRQATKD | AGTIAGLNVL | RIINEPTAAA   | IAYGLDKKVG | AERNVLIFDL | GGGTFDVSIL | TIEDGIFEVK |            |
| 221 | STAGDTHLGG | EDFDNRMVNH | FIAEFKRKHK | KDISENKRAV | RLRTACERA  | KRTLSSSTQA | SIEIDSLYEG | IDFYTSITRA   | RFEELNADLF | RGLDLPVEKA | LRDAKLDKSQ |            |            |
| 331 | IHDIVLVGGS | TRIPKIQKLL | QDFNKGKELN | KSINPDEAVA | YGAAVQAAIL | SGDKSENVQD | LLLLDVTPLS | LGIETAGGVM   | TVLIKRNTHI | PTKQIQTFIT | YSDNQPGVLI |            |            |
| 441 | QVYEGERAMI | KDNLLGKFE  | LTGIPPAPRG | VPQIEVTFDI | DANGILNVSA | VDKSIGKENK | IIITNDKGR  | L SKEDIERMVQ | EAEKYKAED  | KQRDKVSSKN | SLESYAFNMK |            |            |
| 551 | ATVEDEKLQ  | KINDEKQKI  | LDKNEIINW  | LDKNQTAKE  | EFEHQOKELE | KVCNPIITKL | YQSAGMPGG  | MPPGGFPGGA   | PPSGGASSGP | TIEEVD     |            |            |            |

B

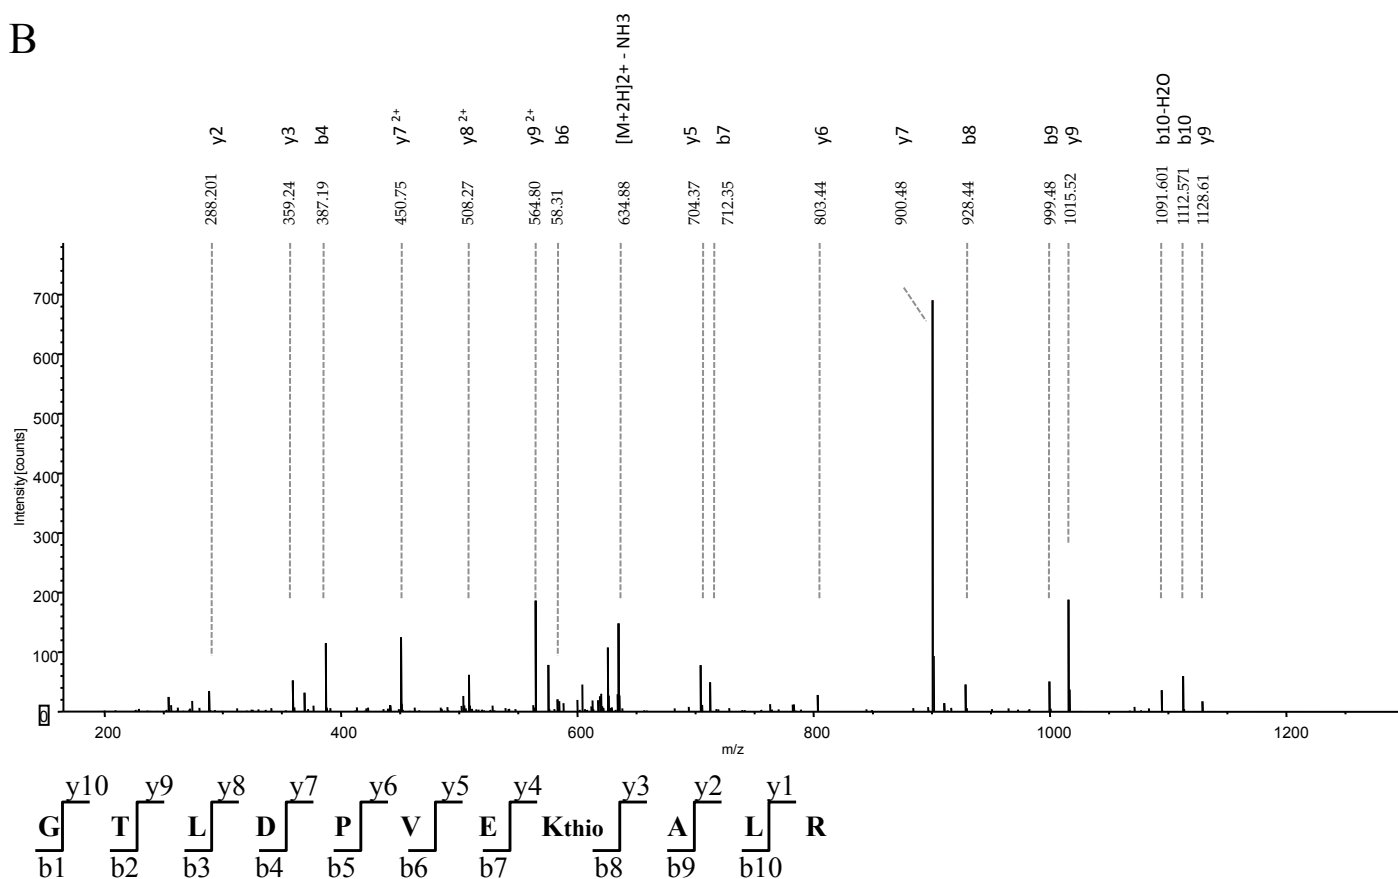

Fig. S3

A

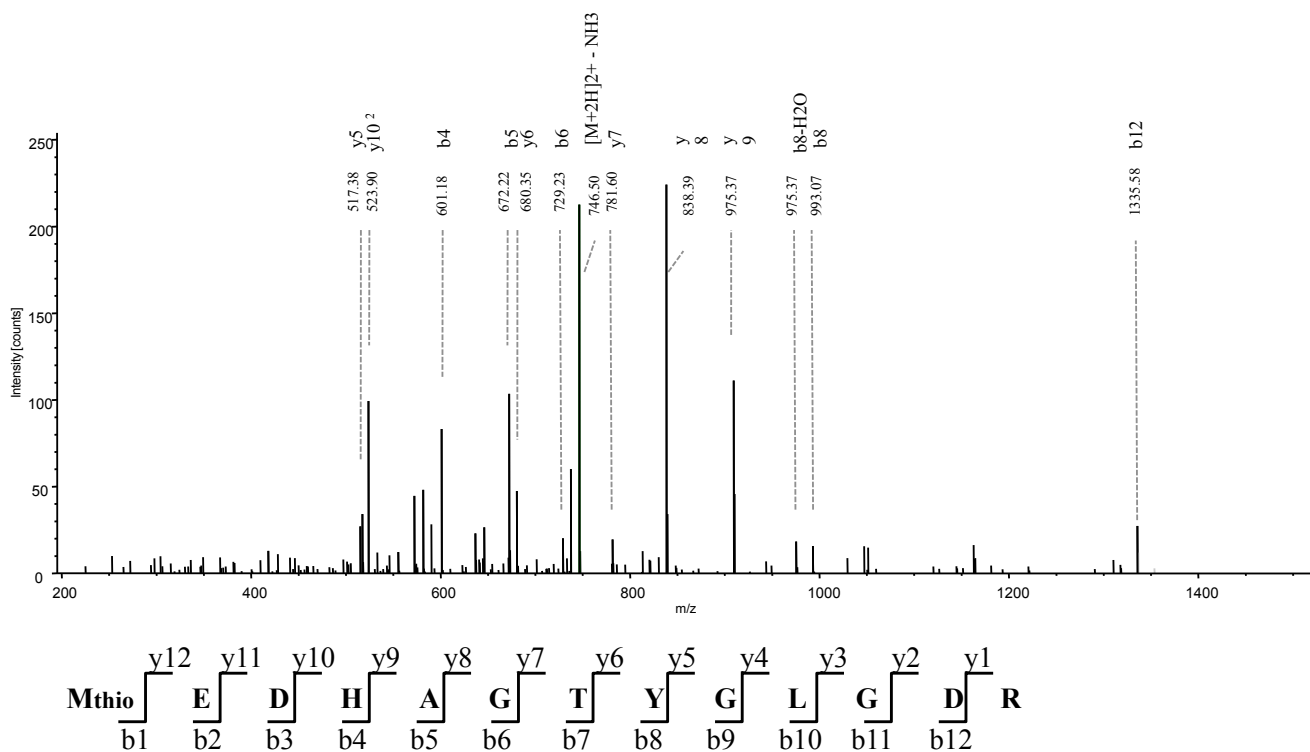

B

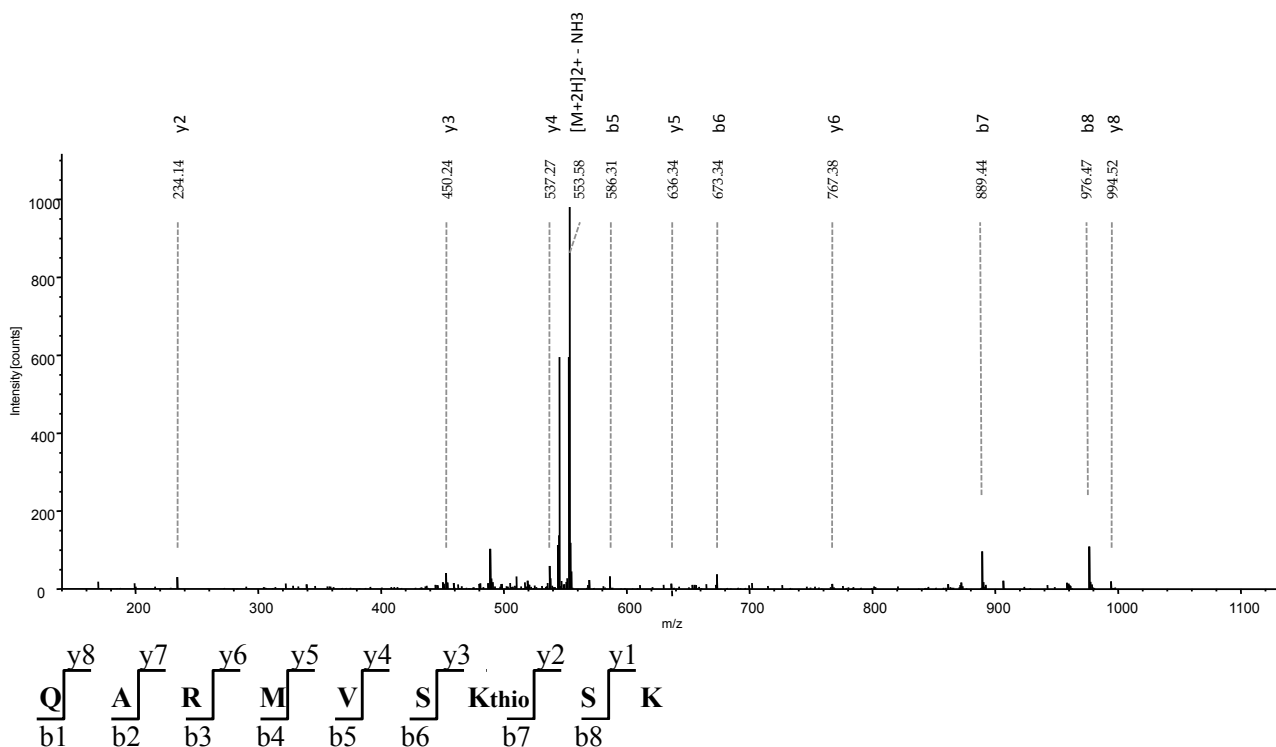

Fig. S4

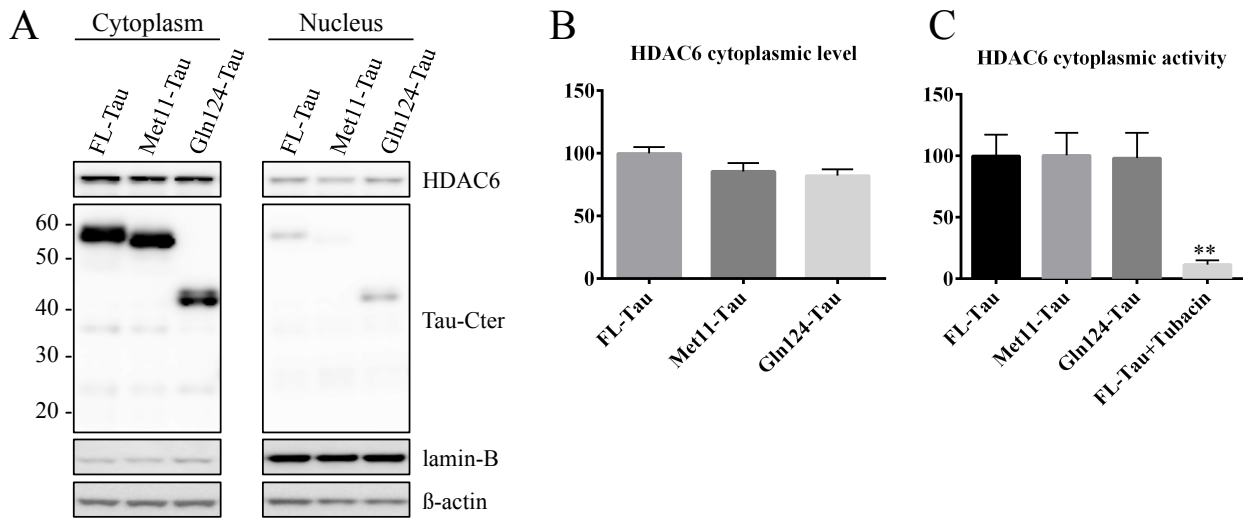

Fig. S5

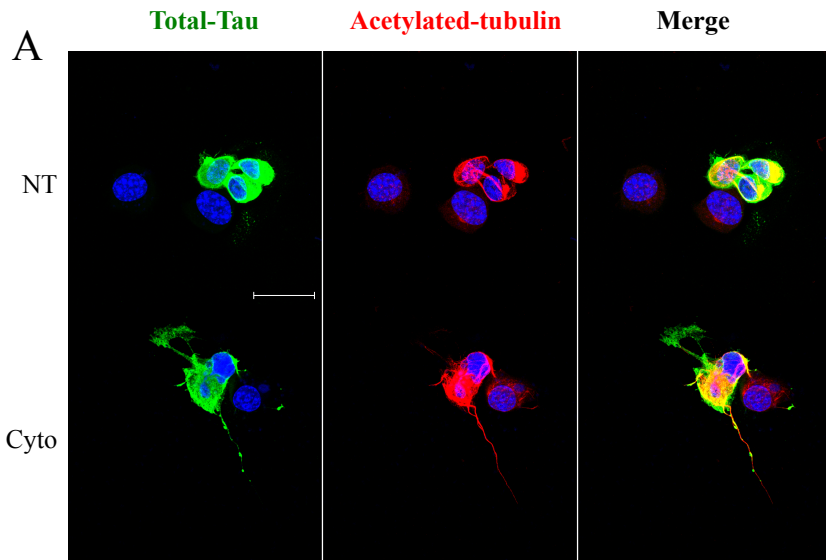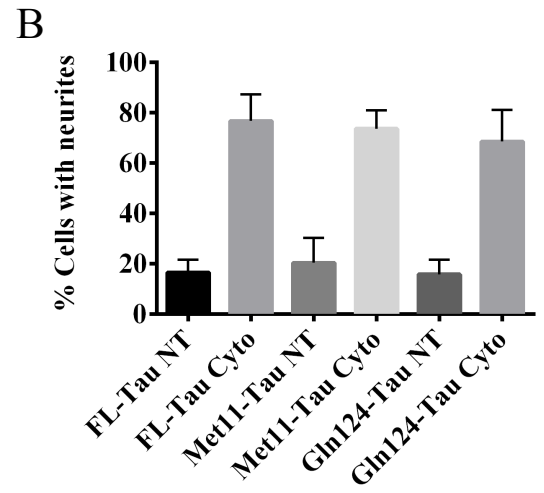

Fig. S6

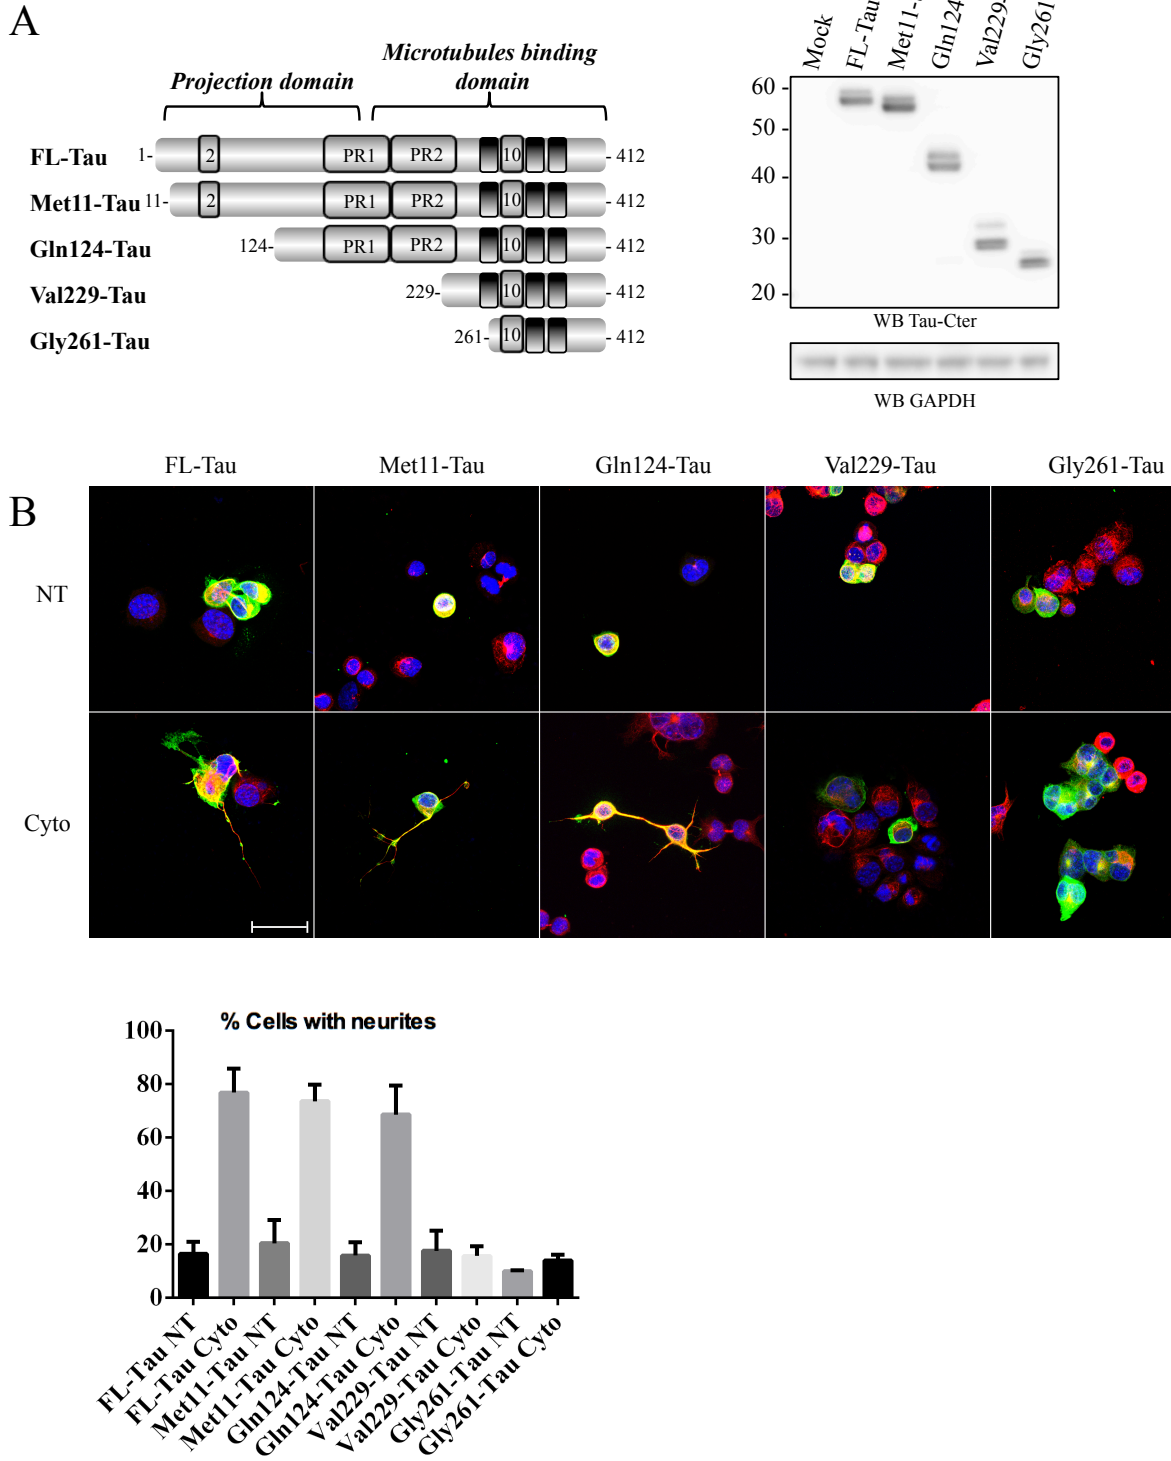

Fig. S6

C

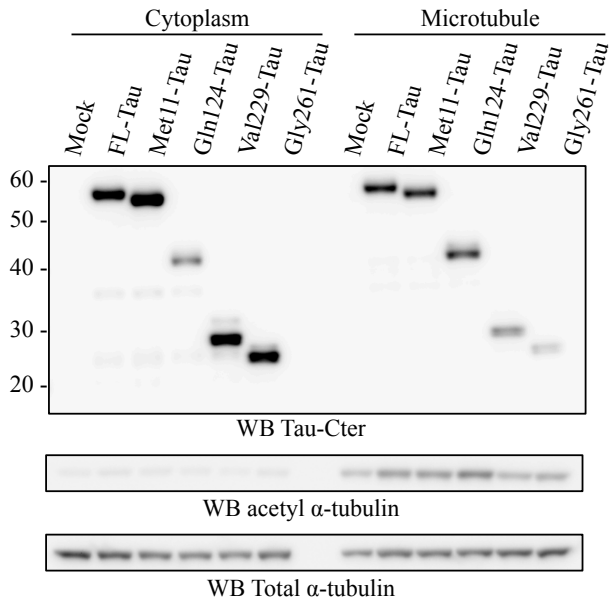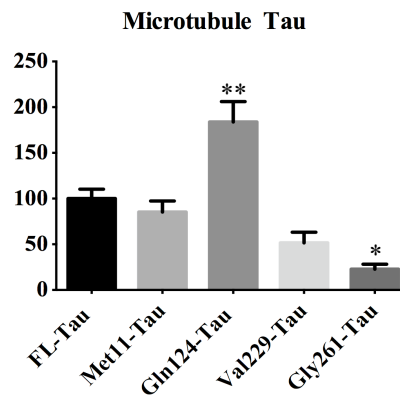

Fig. S7A

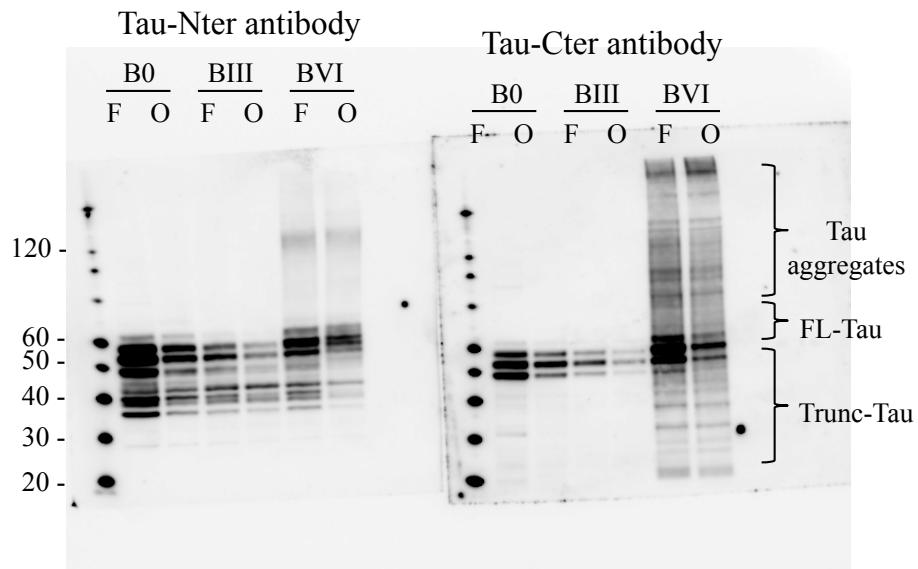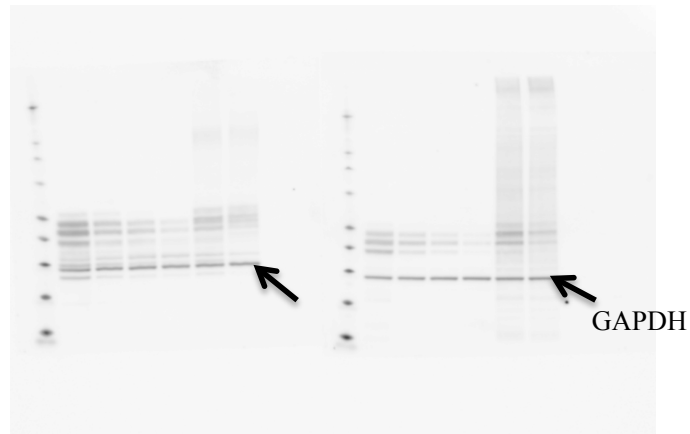

Fig. S7B

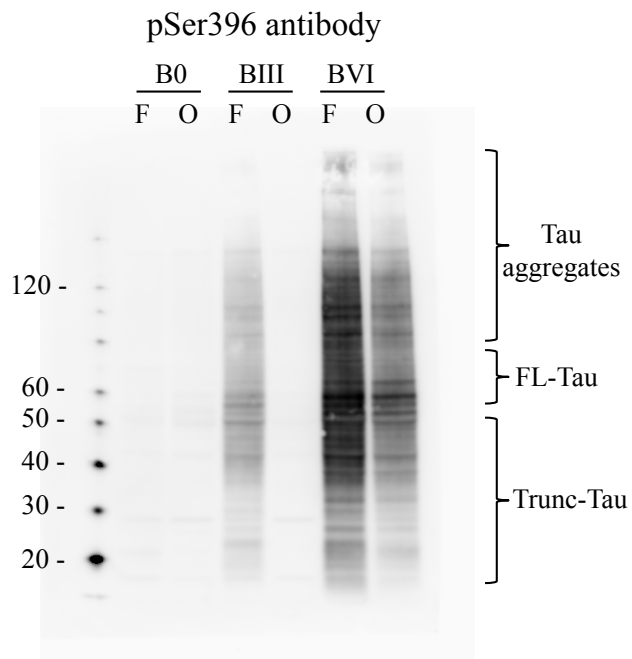

Fig. S8A

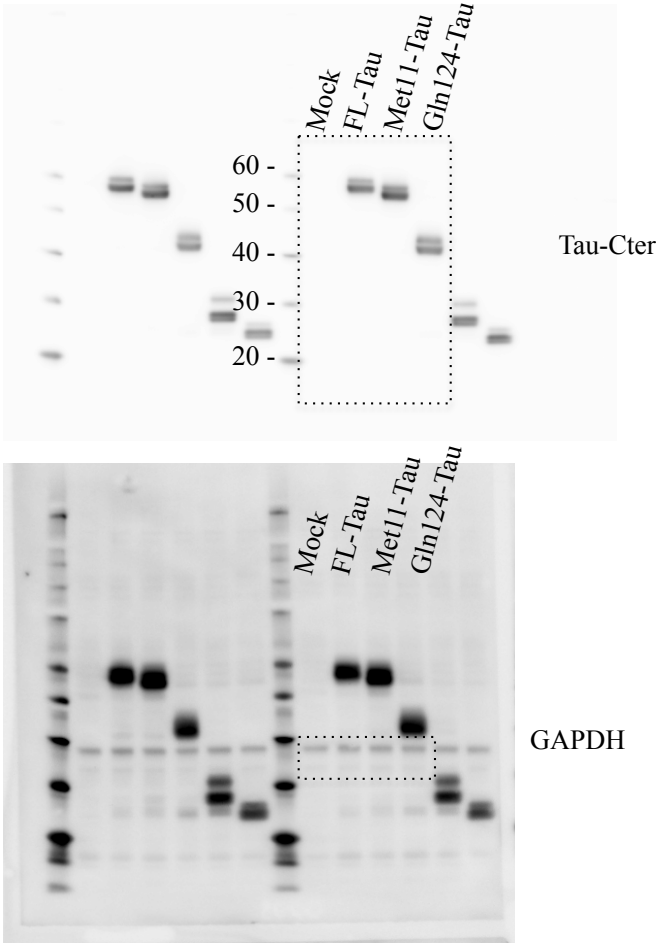



Fig. S8B

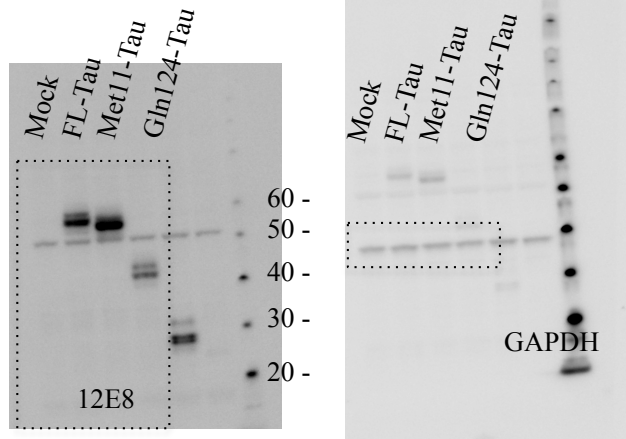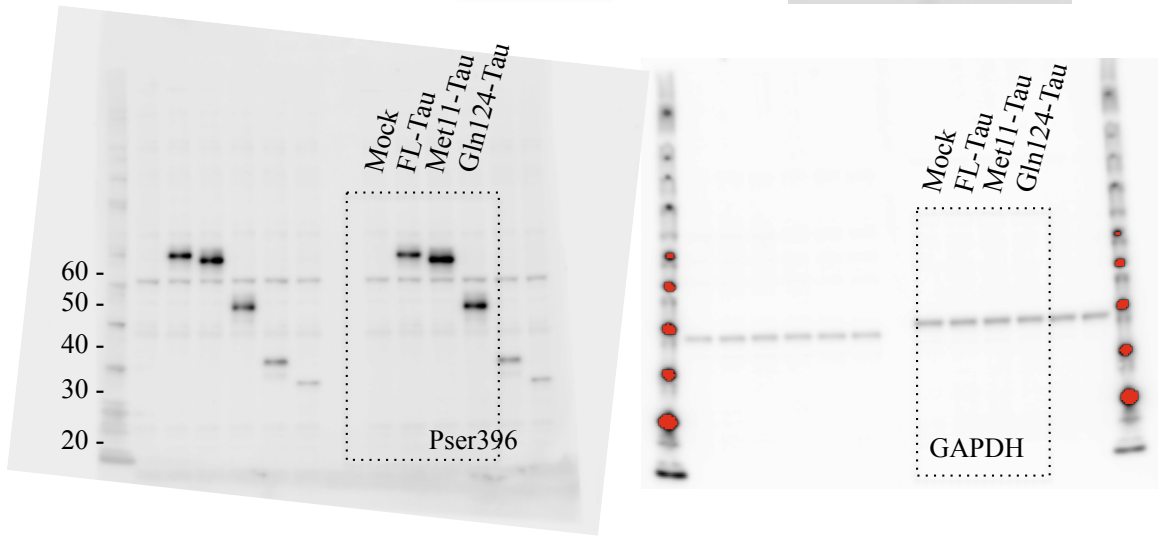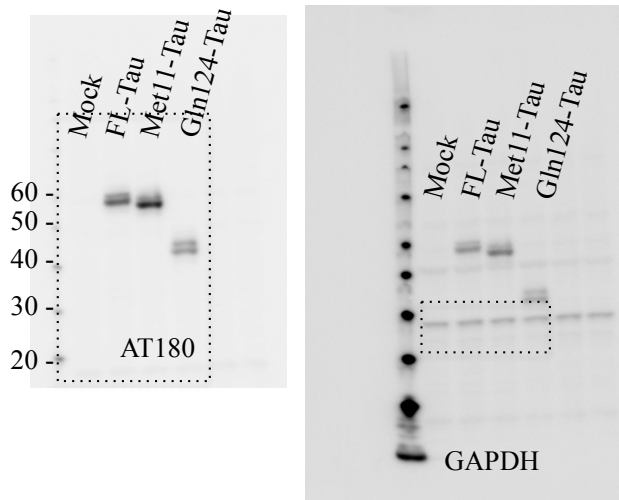

Fig. S9

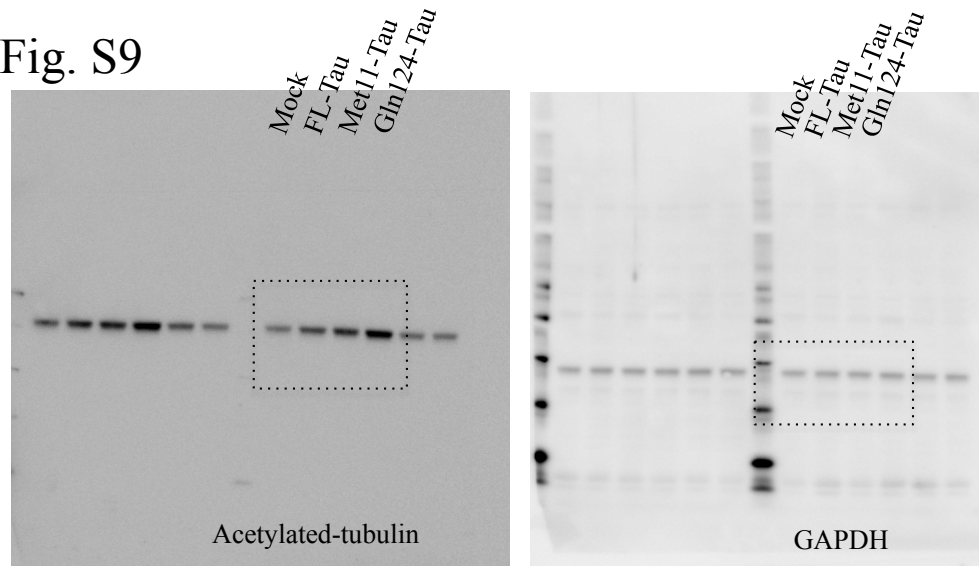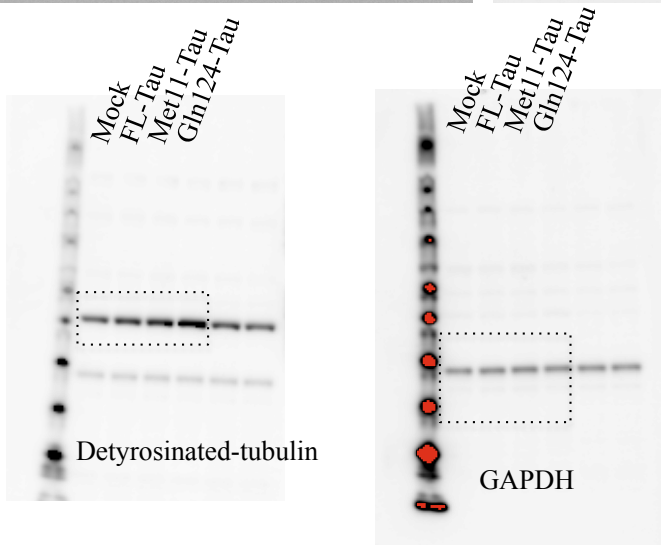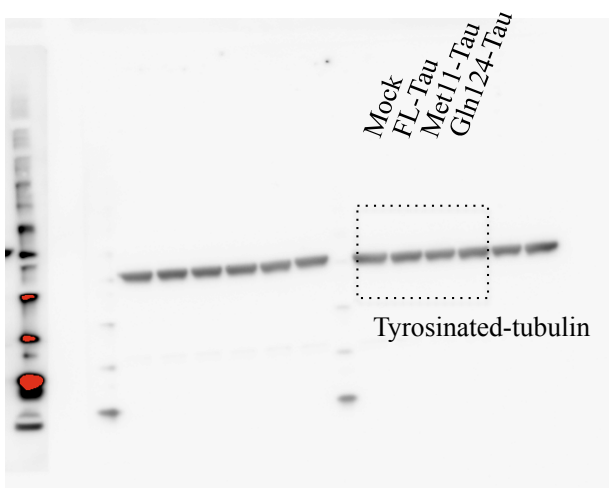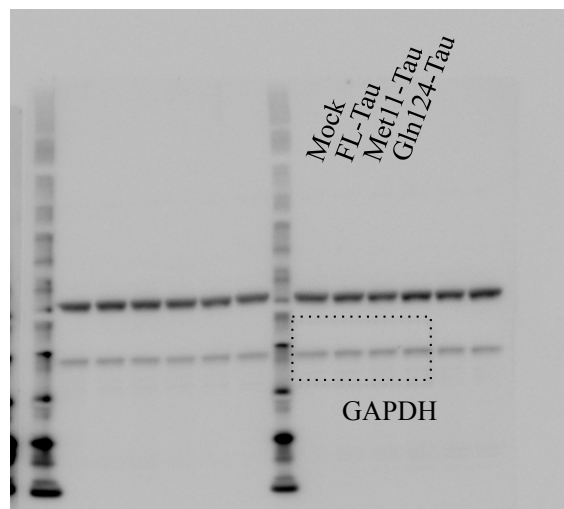

Fig. S10

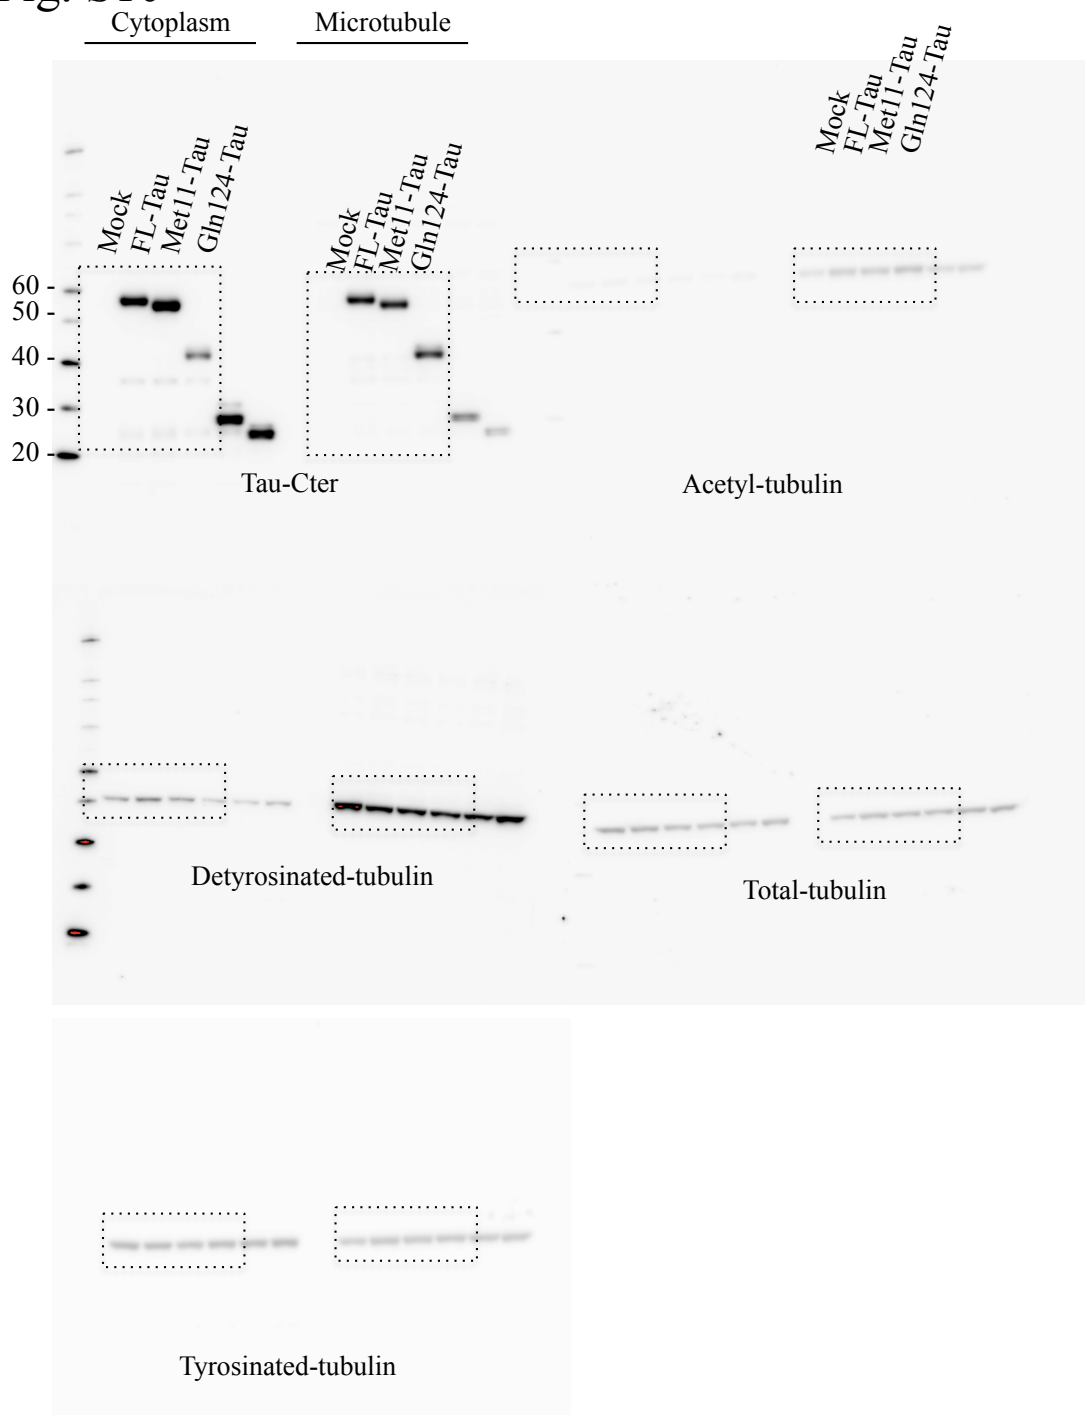

Fig. S11

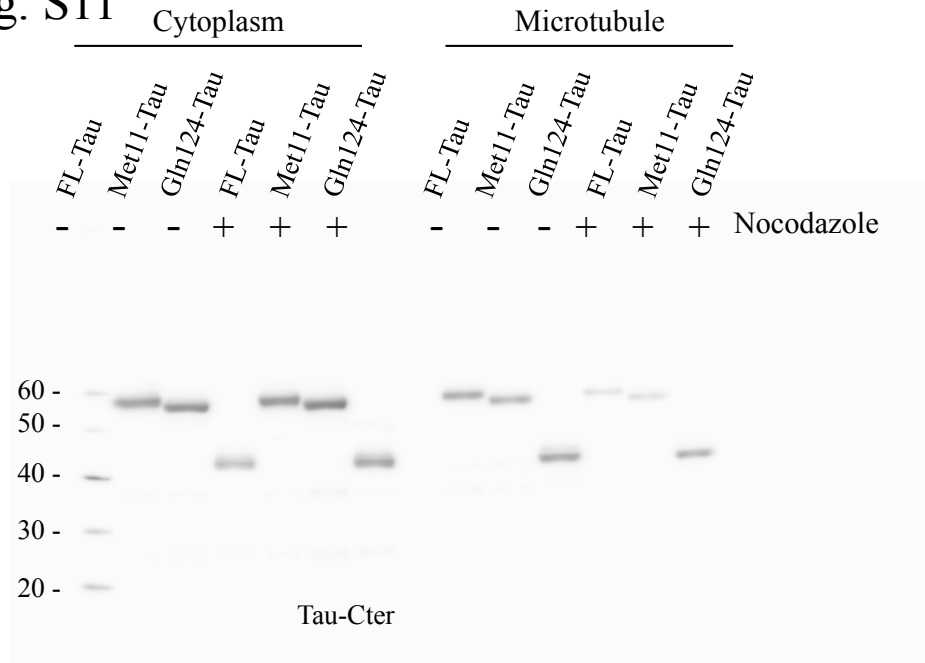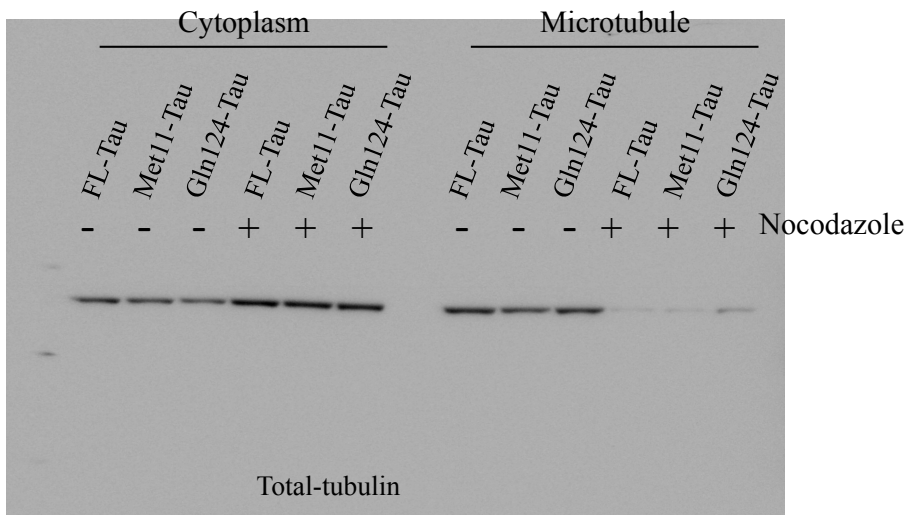

Fig. S12

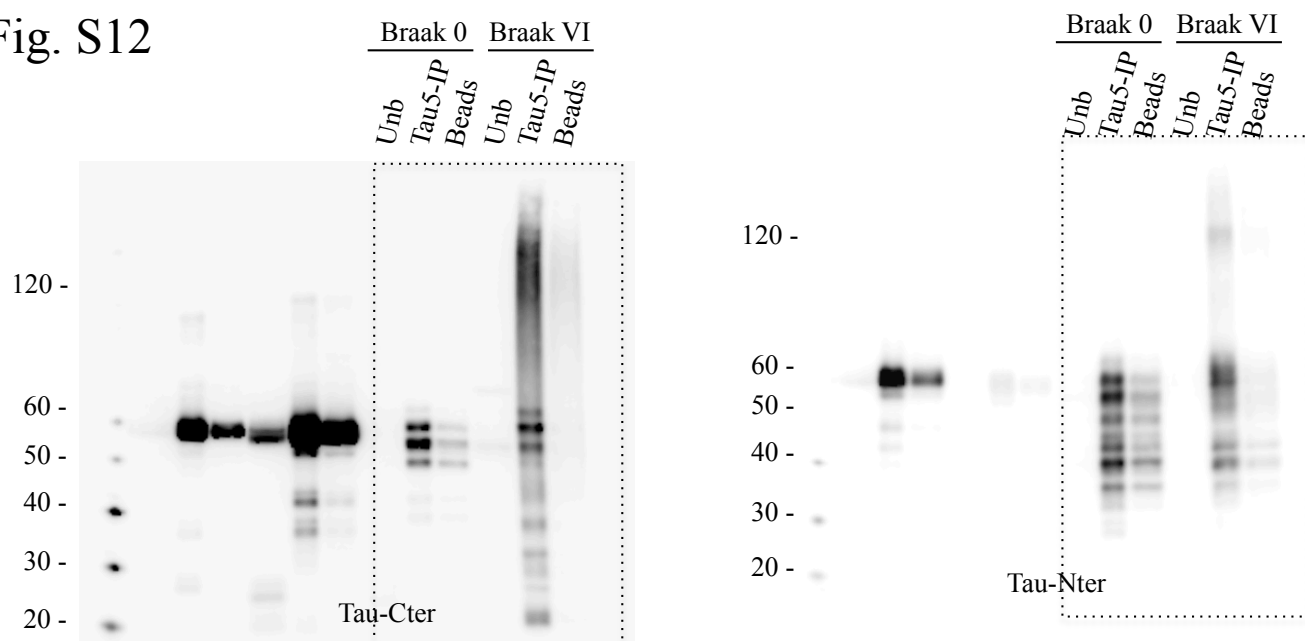

Fig. S13

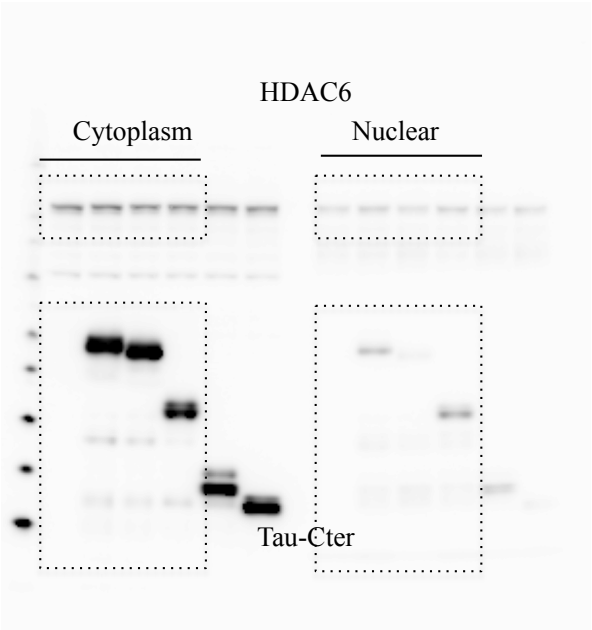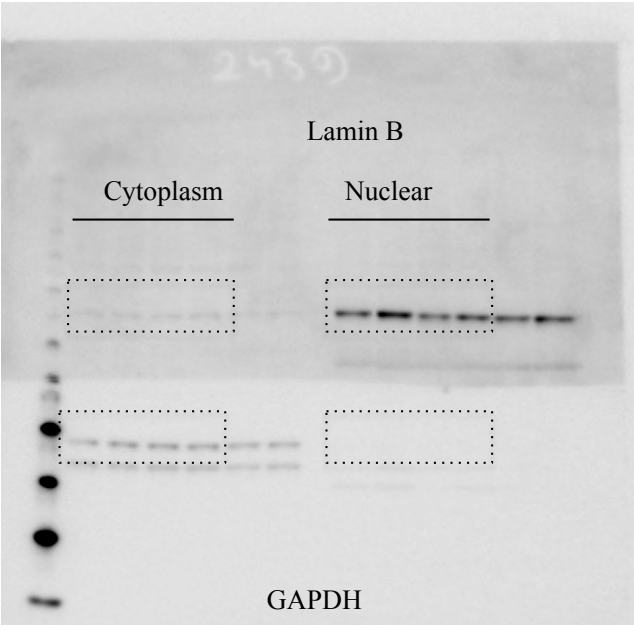

Supplement: srep09659-s1.pdf [file srep09659-s1.pdf]
